# Supplementary material
Source: HighWire-hosted journal article supplement (https://jnis.bmj.com/content/11/6/545)
Supplement: inline-supplementary-material-1 [file inline-supplementary-material-1.docx]

**Supplementary Tables**

**Supplementary Table 1**. Multivariate analysis for predictors of mRS (0-1) at 90 days after endovascular thrombectomy.

**Supplementary Table 2.** Multivariate analysis for predictors of good outcome at 90 days after endovascular thrombectomy in anterior circulation patients.

**Supplementary Table 3.** Multivariate analysis for predictors of complete recanalization

| **Supplementary Table 1. Multivariate analysis for predictors of mRS (0-1) at 90 days after endovascular thrombectomy.** | | | |
| --- | --- | --- | --- |
| **Variable** | **Multivariate Model – mRS 0-1 (N= 1226)** | |  |
| **OR** | **95% CI** | ***P-*value** |
| Female Gender | **0.73** | **0.55–0.97** | **0.031** |
| White | 1.08 | 0.79–1.49 | 0.621 |
| **Age ≥ 80** | **0.47** | **0.32–0.68** | **< 0.001** |
| Onset to groin time | 1.00 | 1–1 | 0.279 |
| Pre-stroke mRS | **0.73** | **0.62–0.86** | **< 0.001** |
| Baseline NIHSS | **0.89** | **0.87–0.91** | **< 0.001** |
| Number of comorbidities | 1.00 | 0.89–1.13 | 0.950 |
| Posterior circulation stroke | **0.42** | **0.25–0.7** | **< 0.001** |
| Prior stroke | 0.93 | 0.51–1.69 | 0.817 |
| IV-tPA | 1.03 | 0.77–1.4 | 0.824 |
| IA-tPA | 0.91 | 0.62–1.36 | 0.655 |
| Number of attempts | **0.83** | **0.75–0.92** | **< 0.001** |
| Use of aspiration at first pass | 0.95 | 0.69–1.31 | 0.766 |
| TICI Score | **1.16** | **1.02–1.32** | **0.022** |
| Complications | 0.53 | 0.24–1.15 | 0.108 |
| Variables showing statistical significance (p < 0.05) are bolded. | | | |

| **Supplementary Table 2. Multivariate analysis for predictors of good outcome at 90 days after endovascular thrombectomy in anterior circulation patients.** | | | |
| --- | --- | --- | --- |
| **Variable** | **Multivariate-Anterior Circulation (N= 816)** | | |
| **OR** | **95% CI** | ***P-*value** |
| Female Gender | **0.57** | **0.41–0.79** | **0.001** |
| White | 1.24 | 0.89–1.74 | 0.209 |
| **Age ≥ 80** | **0.35** | **0.23–0.53** | **< 0.001** |
| Onset to groin time | 1.00 | 1–1 | 0.509 |
| Pre-stroke mRS | **0.69** | **0.58–0.81** | **< 0.001** |
| Baseline NIHSS | **0.91** | **0.89–0.94** | **< 0.001** |
| Number of comorbidities | 0.83 | 0.72–0.96 | 0.130 |
| Prior stroke | 0.97 | 0.53–1.77 | 0.918 |
| IV-tPA | 1.10 | 0.78–1.55 | 0.573 |
| IA-tPA | 1.09 | 0.68–1.76 | 0.711 |
| Number of attempts | **0.81** | **0.73–0.9** | **< 0.001** |
| TICI Score | **1.26** | **1.08–1.46** | **0.003** |
| Complications | 1.10 | 0.47–2.58 | 0.828 |
| ASPECT score | **1.20** | **1.09–1.32** | **< 0.001** |
| Variables showing statistical significance (p < 0.05) are bolded. | | | |

| **Supplementary Table 3. Multivariate analysis for predictors of complete recanalization.** | | | |
| --- | --- | --- | --- |
| **Variable** | **Multivariate Model for TICI 2C-3 (N= 1178)** | | |
| **OR** | **95% CI** | ***P-*value** |
| Female Gender | 0.78 | 0.53–1.15 | 0.205 |
| **White** | **0.54** | **0.34–0.85** | **0.007** |
| Age ≥ 80 | 1.09 | 0.7–1.69 | 0.709 |
| Onset to groin time | 1.00 | 1–1 | 0.982 |
| Pre-stroke mRS | **0.93** | **0.8–1.07** | **0.307** |
| Baseline NIHSS | **1.00** | **0.98–1.03** | **0.817** |
| Number of comorbidities | 0.91 | 0.78–1.06 | 0.213 |
| Posterior circulation stroke | 1.07 | 0.61–1.9 | 0.805 |
| Prior stroke | 1.60 | 0.68–3.76 | 0.282 |
| IV-tPA | 1.27 | 0.85–1.9 | 0.244 |
| IA-tPA | 0.95 | 0.58–1.56 | 0.846 |
| Number of attempts | **0.70** | **0.64–0.77** | **< 0.001** |
| Use of aspiration at first pass | **1.86** | **1.24–2.79** | **0.003** |
| Variables showing statistical significance (p < 0.05) are bolded. | | | |
